# Supplementary material for: GPR and IRT Tests in two Historical Buildings in Gravina in Puglia
Source: Copernicus journal article supplement (doi:10.5194/gi-2016-14), 2016-07-05

$v = 0.3 \text{ m/ns}$

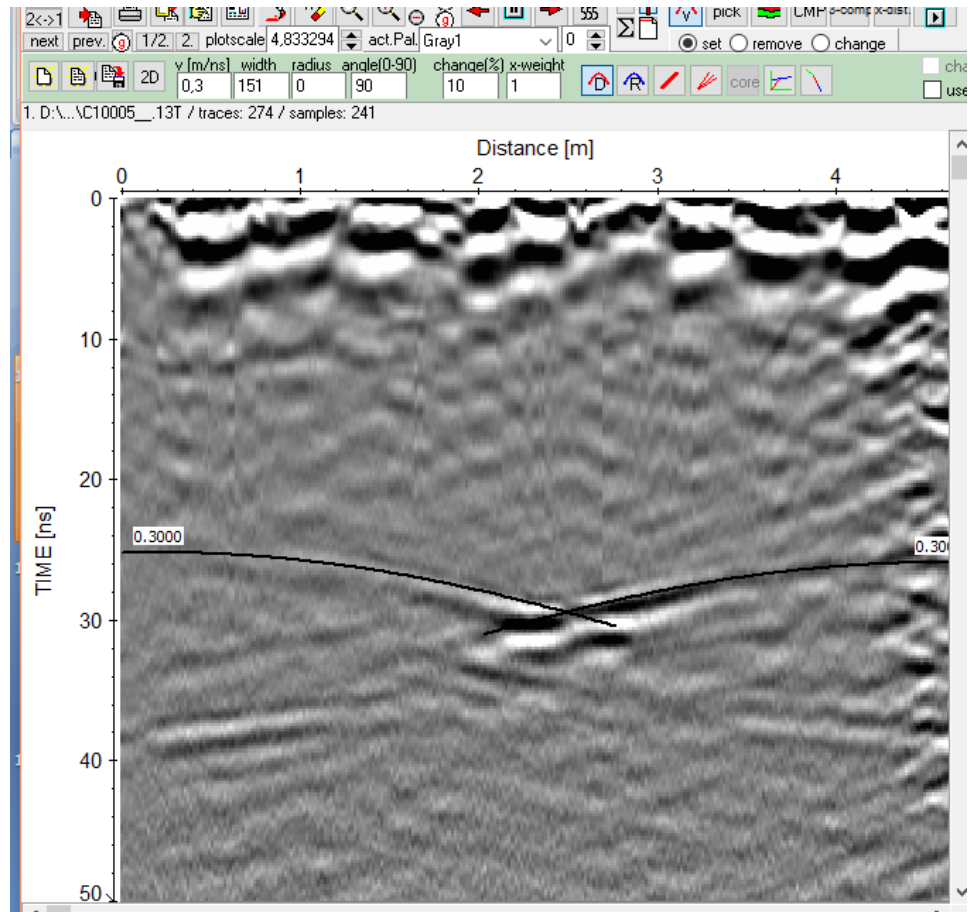

$v = 0.29 \text{ m/ns}$

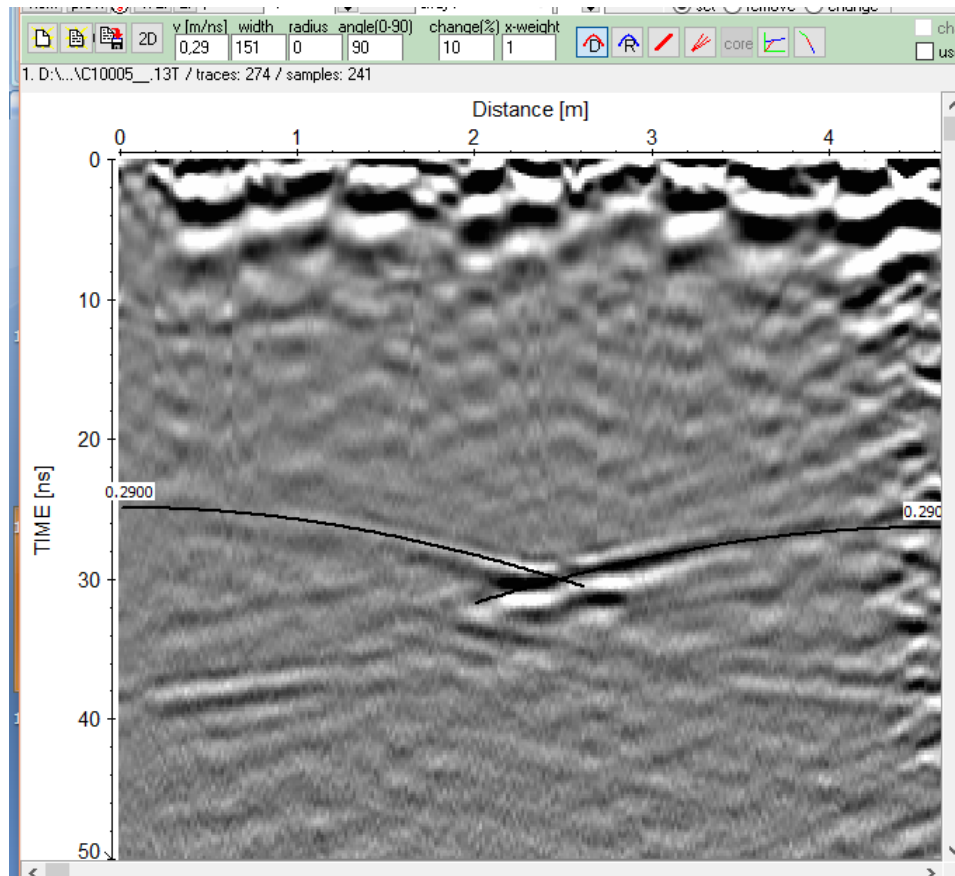

$$v = 0.27 \text{ m/ns}$$

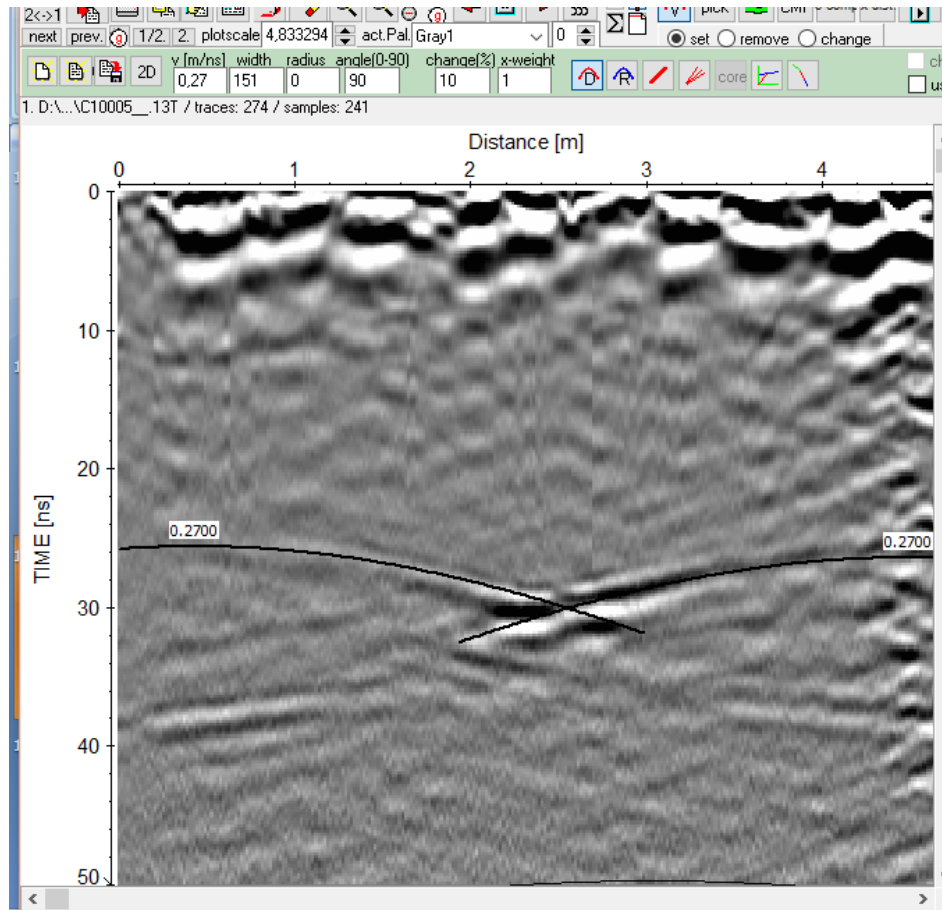

$v = 0.25 \text{ m/ns}$

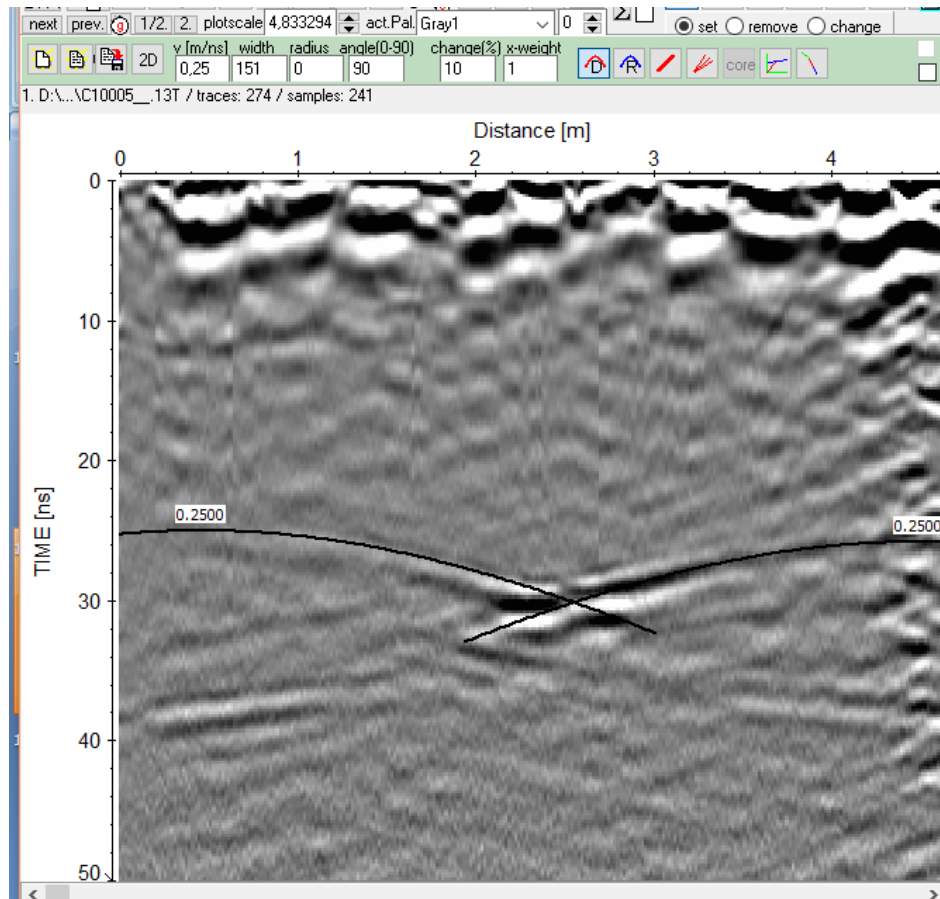

$$v = 0.22 \text{ m/ns}$$

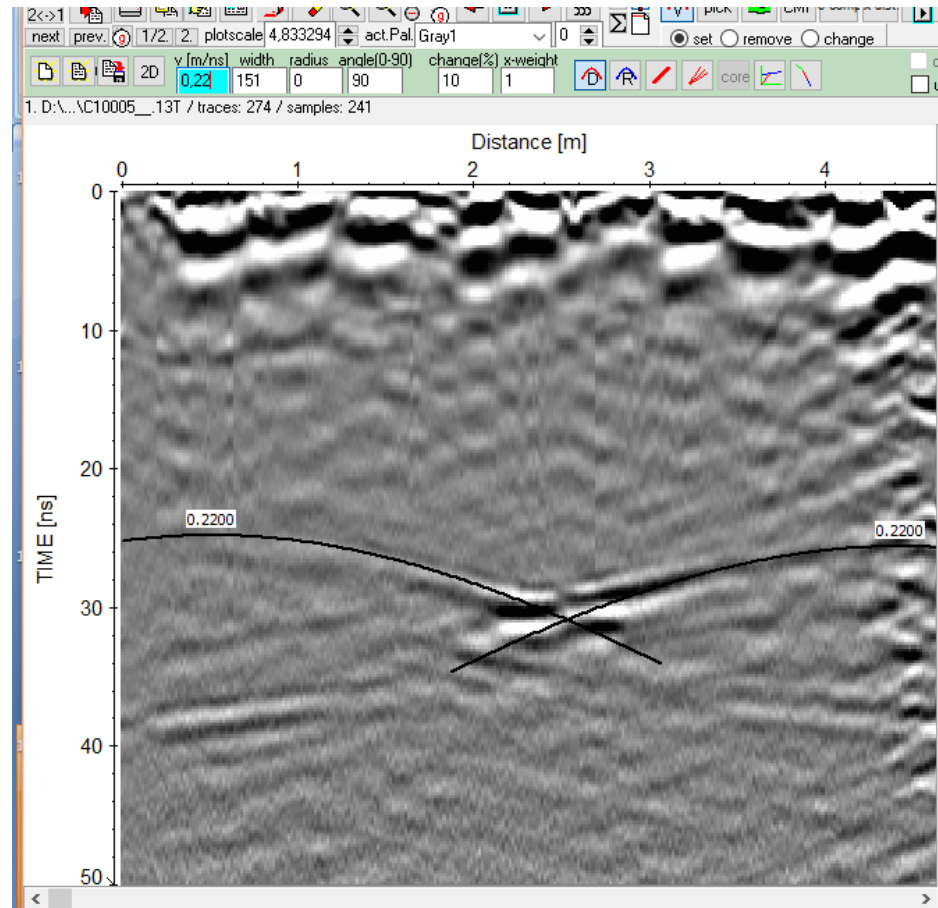

$$v = 0.21 \text{ m/ns}$$

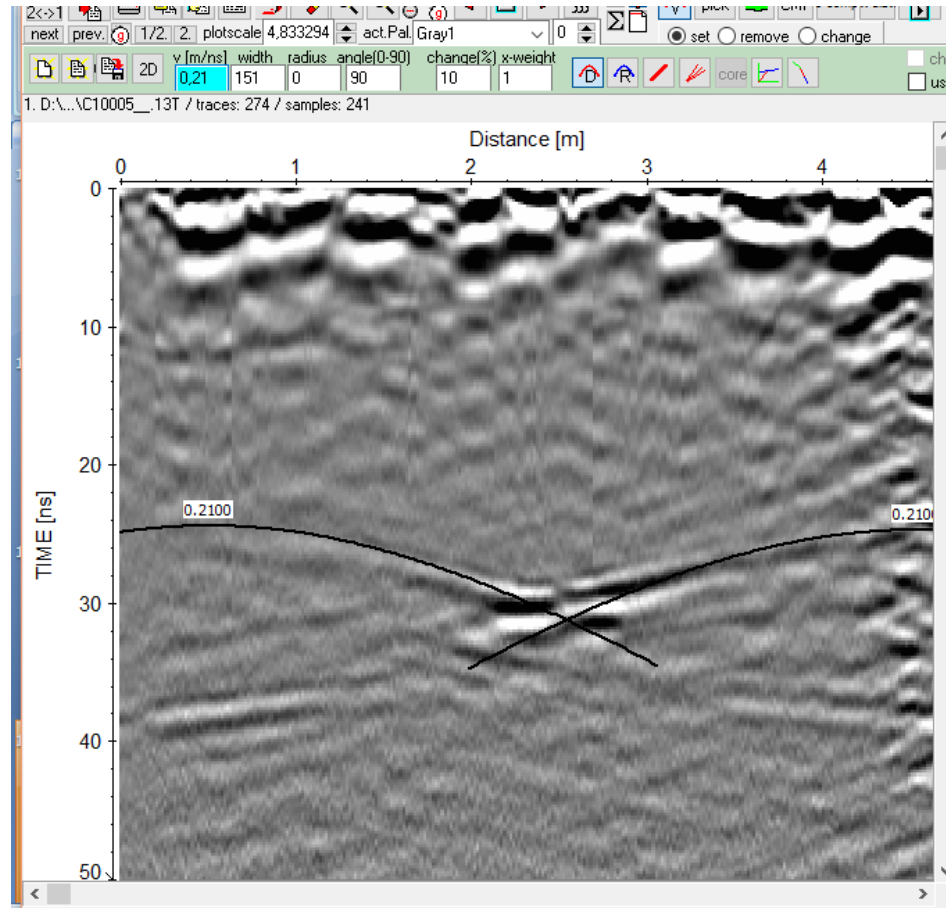

Supplement: Supplementary file [file gi-2016-14-AC2-supplement.pdf]
